# Supplementary material for: Add-On Effect of 0.01% Atropine in Orthokeratology Wearers for Myopia Control in Children: A 2-Year Retrospective Study
Source: PubMed Central journal article supplement — Ophthalmol Ther. 2023 Jul 5;12(5):2557–68. doi: 10.1007/s40123-023-00755-4 (PMC10442030; doi:10.1007/s40123-023-00755-4), 2023-07-05
Supplement: 40123_2023_755_MOESM1_ESM.pdf [file 40123_2023_755_MOESM1_ESM.pdf]

## **SUPPLEMENTARY MATERIAL**

### **Add-on effect of 0.01% atropine in orthokeratology wearers for myopia control in children: A 2-year retrospective study**

Linlin Du<sup>1</sup>, Jun Chen<sup>1</sup>, Li Ding<sup>1</sup>, Jingjing Wang<sup>1</sup>, Jinliuxing Yang<sup>1</sup>, Hui Xie<sup>1</sup>, Xun Xu<sup>1,2</sup>, Xiangui He<sup>\*1,2</sup>, Mengjun Zhu<sup>\*1</sup>

1. Shanghai Eye Disease Prevention and Treatment Center, Shanghai Eye Hospital, Shanghai Vision Health Center & Shanghai Children Myopia Institute, Shanghai 200040, China
2. National Clinical Research Center for Eye Diseases, Shanghai Key Laboratory of Ocular Fundus Diseases, Shanghai General Hospital, Shanghai Jiao Tong University, Shanghai 200080, China

\*Xiangui He and Mengjun Zhu contributed equally as co-last authors.

#### **Correspondence:**

Name: Mengjun Zhu

Email address: morning5012@163.com

Tel: +86 13818102138

Address: No. 1440 Hongqiao Road, Shanghai, 201103, China

Name: Xiangui He

Email address: xianhezi@163.com

Tel: +86 15000755422

Address: No. 1440 Hongqiao Road, Shanghai, 201103, China

**Table S1. Characteristics of patients with different age and refraction in combination therapy group and monotherapy group <sup>a</sup>**

| Age ≤ 10 yrs       | Low myopia          |                    |         | Moderate myopia     |                    |         |
|--------------------|---------------------|--------------------|---------|---------------------|--------------------|---------|
|                    | AOK group<br>(N=11) | OK group<br>(N=20) | P value | AOK group<br>(N=26) | OK group<br>(N=17) | P value |
| Age, year          | 8.91±0.47           | 8.69±0.75          | 0.408*  | 8.61±0.93           | 8.94±0.83          | 0.243*  |
| Gender=F, No. (%)  | 9(81.8)             | 10(50.0)           | 0.408‡  | 15(57.7)            | 10(58.8)           | 1.000‡  |
| SER, D             | -2.11±0.53          | -2.03±0.54         | 0.687*  | -3.93±0.72          | -4.10±0.89         | 0.512*  |
| AL, mm             | 24.28±0.59          | 24.34±0.64         | 0.816*  | 24.88±0.51          | 25.08±0.73         | 0.300*  |
| AVE, D             | 42.71±1.37          | 42.63±1.03         | 0.858*  | 43.24±1.05          | 43.09±0.89         | 0.625*  |
| CCT, μm            | 552.64±16.68        | 543.85±34.64       | 0.437*  | 547.73±21.46        | 551.88±27.62       | 0.583*  |
| NCT, mmHg          | 15.28±1.12          | 16.42±2.07         | 0.101*  | 16.00±2.68          | 15.74±2.55         | 0.749*  |
| 2-years' AL change | 0.26±0.20           | 0.66±0.30          | <0.001* | 0.32±0.22           | 0.39±0.31          | 0.409*  |
| Age > 10 yrs       | AOK group<br>(N=6)  | OK group<br>(N=8)  | P value | AOK group<br>(N=25) | OK group<br>(N=23) | P value |
| Age, year          | 11.34±0.58          | 11.14±0.51         | 0.496*  | 11.33±1.02          | 11.52±1.05         | 0.534*  |
| Gender=F, No. (%)  | 1(16.7)             | 5(62.5)            | 0.242‡  | 15(60.0)            | 15(65.2)           | 0.941‡  |
| SER, D             | -2.08±0.39          | -2.11±0.34         | 0.862*  | -4.48±1.08          | -4.09±0.94         | 0.192*  |
| AL, mm             | 25.31±0.98          | 24.82±0.87         | 0.343*  | 25.64±0.92          | 25.57±0.69         | 0.750*  |
| AVE, D             | 41.73±1.39          | 41.89±1.06         | 0.809*  | 42.06±1.41          | 42.46±1.39         | 0.330*  |
| CCT, μm            | 566.33±30.16        | 555.62±23.49       | 0.468*  | 546.00±30.96        | 550.43±27.35       | 0.603*  |
| NCT, mmHg          | 15.20±1.44          | 14.38±2.50         | 0.486*  | 16.68±2.32          | 16.17±2.05         | 0.425*  |
| 2-years' AL change | 0.39±0.19           | 0.35±0.32          | 0.831*  | 0.23±0.23           | 0.33±0.32          | 0.214*  |

Abbreviations: AOK, combination therapy group; OK, monotherapy group; SER, spherical equivalent refraction; D, diopter; AL, axial length; mm, millimeter; AVE, average keratometry; CCT, central corneal thickness; μm, micrometer; NCT, non-contact tonometer; mmHg, millimetre of mercury.

<sup>a</sup> Data are presented as mean ± standard deviation unless otherwise indicated.

\* Independent group t test ‡ Chi-square test
